# Supplementary material for: Change in inflammatory parameters in prefrail and frail persons obtaining physical training and nutritional support provided by lay volunteers: A randomized controlled trial
Source: PubMed Central journal article supplement (PMC5638289; doi:10.1371/journal.pone.0185879), 2017-10-12
Supplement: pone.0185879.s003.pdf [file pone.0185879.s003.pdf]

**Vote:**

**EK Nr: 1416/2013**

**Project title:** Nutrition intervention and physical training in malnourished frail community-dwelling elderly subjects carried out by trained lay “buddies”

**Applicant:** Sandra Haider

**Institution:** Medical University of Vienna/ Centre for Public Health

**Sponsor:** Medical University of Vienna/ Centre for Public Health

**Involved centres:**

| Ethics committee                                 | Trial center                                                                  | Investigator                                |
|--------------------------------------------------|-------------------------------------------------------------------------------|---------------------------------------------|
| Ethics committee of Medical University of Vienna | Department of Internal Medicine III, Division of Endocrinology and Metabolism | Ao.Univ.-Prof. Dr.med.univ. Bernhard Ludvik |

The statement of the ethics committee is due to the following submitted documents:

| Document               | Name                                                  | Version | Date       |
|------------------------|-------------------------------------------------------|---------|------------|
| Case report form (CRF) | CRF_Buddies_1.0_24042013                              | 1.0     | 24.04.2013 |
|                        | CRF_Frailty_1.0_24042013                              | 1.0     | 24.04.2013 |
| Conflict of Interest   | ConflictOfInterest_22042013                           | 1.0     | 22.04.2013 |
| CV                     | CV_BernhardLudvik_26.04.2013                          | 1.0     | 26.04.2013 |
|                        | Lebenslauf_Dorner_24042013                            |         | 24.04.2013 |
|                        | Lebenslauf_Schindler_24042013                         |         | 24.04.2013 |
|                        | Lebenslauf_Lackinger_24042013                         |         | 24.04.2013 |
|                        | Lebenslauf_Luger_24042013                             |         | 24.04.2013 |
|                        | Lebenslauf_Kapan_24042013                             |         | 24.04.2013 |
|                        | Lebenslauf_Prenner_24042013                           |         |            |
|                        | Lebenslauf_Oberbauer_24042013                         |         |            |
|                        | Lebenslauf_Haider_24042013                            |         |            |
| Confirmation of cover  | Versicherungsbestätigung_1.1_22082013                 | 1.1     | 22.08.2013 |
|                        | Versicherungsbestätigung_1.0                          | 1.0     | 02.04.2013 |
|                        | Versicherungsbestätigung-Buddies-Haftpflicht_1.0      | 1.0     | 16.08.2011 |
|                        | Versicherungsbestätigung-Buddies_Unfall_1.0           | 1.0     | 29.06.2011 |
| Other                  | Verpflichtungserklaerung_Haider                       | 1.0     | 25.04.2013 |
|                        | Verpflichtungserklaerung_Kapan                        | 1.0     | 25.04.2013 |
|                        | Verpflichtungserklaerung_Luger                        | 1.0     | 25.04.2013 |
|                        | Verpflichtungserklaerung_Prenner                      | 1.0     | 25.04.2013 |
|                        | Fragebogen_1.0_24042013                               | 1.0     | 24.04.2013 |
| Patient information    | PatientInneninformation_Buddies_1.3_markiert_21082013 | 1.3     | 21.08.2013 |

|                |                                                                    |     |            |
|----------------|--------------------------------------------------------------------|-----|------------|
|                | PatientInneninformation_Buddies_1.3_21082013                       | 1.3 | 21.08.2013 |
|                | PatientInneninformation_Buddies_1.2_markiert_25072013              | 1.2 | 25.07.2013 |
|                | PatientInneninformation_Buddies_1.2_25072013                       | 1.2 | 25.07.2013 |
|                | PatientInneninformation_Frailty_1.2_24072013                       | 1.2 | 24.07.2013 |
|                | PatientInneninformation_Frailty_1.2_markiert_24072013              | 1.2 | 24.07.2013 |
|                | PatientInneninformation_Frailty-Rekrutierung_1.1_markiert_08072013 | 1.1 | 08.07.2013 |
|                | PatientInneninformation_Frailty-Rekrutierung_1.1_08072013          | 1.1 | 08.07.2013 |
|                | PatientInneninformation_Frailty_1.1_markiert_08072013              | 1.1 | 08.07.2013 |
|                | PatientInneninformation_Frailty_1.1_08072013                       | 1.1 | 08.07.2013 |
|                | PatientInneninformation_Buddies_1.1_08072013                       | 1.1 | 08.07.2013 |
|                | PatientInneninformation_Buddies_1.1_markiert_08072013              | 1.1 | 08.07.2013 |
|                | PatientInneninformation_Buddies_1.0_24042013                       | 1.0 | 24.04.2013 |
|                | PatientInneninformation_Frailty_1.0_24042013                       | 1.0 | 24.04.2013 |
|                | PatientInneninformation_Frailty-Rekrut_1.0_24042013                | 1.0 | 24.04.2013 |
| Study protocol | StudyProtocol_1.1_markiert_08072013                                | 1.1 | 08.07.2013 |
|                | StudyProtocol_1.1_08072013                                         | 1.1 | 08.07.2013 |
|                | Studienprotokoll_1.0_24042013                                      | 1.0 | 24.04.2013 |

The commission adopts the following resolution (with X marks):

|                                     |                                             |
|-------------------------------------|---------------------------------------------|
| <input checked="" type="checkbox"/> | There is no objection to conduct the study. |
|-------------------------------------|---------------------------------------------|

|                                                                                     |                                                                                                                                                                             |                                                                                                                          |
|-------------------------------------------------------------------------------------|-----------------------------------------------------------------------------------------------------------------------------------------------------------------------------|--------------------------------------------------------------------------------------------------------------------------|
| <b>Signaturwert</b>                                                                 | biE5HK0UAEwTln7deNLKHhYIhzDAGk+SczDoSCAejdyAD7EdXJ66Qq0oak+v3wgx1VQs46Yz8nWwemJFvn8yuQ==                                                                                    |                                                                                                                          |
|  | <b>Unterzeichner</b>                                                                                                                                                        | Dr. Ernst Singer                                                                                                         |
|                                                                                     | <b>Aussteller-Zertifikat</b>                                                                                                                                                | CN=a-sign-Premium-Sig-02,OU=a-sign-Premium-Sig-02,O=A-Trust Ges. f. Sicherheitssysteme im elektr. Datenverkehr GmbH,C=AT |
|                                                                                     | <b>Serien-Nr.</b>                                                                                                                                                           | 456499                                                                                                                   |
|                                                                                     | <b>Methode</b>                                                                                                                                                              | urn:pdfsigfilter:bka.gv.at:binaer:v1.1.0                                                                                 |
|                                                                                     | <b>Parameter</b>                                                                                                                                                            | etsi-moc-1.1@7806fc14                                                                                                    |
| <b>Prüfinformation</b>                                                              | Informationen zur Prüfung der elektronischen Signatur und des Ausdrucks finden Sie unter: <a href="http://www.signaturpruefung.gv.at">http://www.signaturpruefung.gv.at</a> |                                                                                                                          |
| <b>Datum/Zeit-UTC</b>                                                               | 2013-08-27T13:44:27Z                                                                                                                                                        |                                                                                                                          |

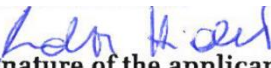  
Signature of the applicant

Mag. Sandra Haider  
Medical University of Vienna/ Centre for Public Health  
Kinderspitalgasse 15/1  
1090 Vienna, Austria
